# Supplementary material for: PolDIP2 interacts with human PrimPol and enhances its DNA polymerase activities
Source: PubMed Central journal article supplement (PMC4838387; doi:10.1093/nar/gkw175), 2016-03-16
Supplement: supp_gkw175_nar-03059-d-2015-File008.pdf [file supp_gkw175_nar-03059-d-2015-File008.pdf]

## Supplementary Tables

**Table S1: Sequences of the DNA oligonucleotides used in the primase and primer extension assays.** Lesions within the sequences are denoted in red.

**Table S2. MS analysis of PoIDIP2-PrimPol cross-linked peptides.** The amino acid sequence of cross-linked PoIDIP2 (green) and PrimPol (blue) peptides identified in the MS analysis are shown. Crosslinked residues in each case are shown in bold. Peptide location indicates the location of peptide in the specific constructs used for the analysis, not the wild-type protein. Scores are based on the probability of the occurrence of an ion in addition to the intensity of the signal in the fragment spectrum, as given by the StavroX analysis software. 'm/z' indicates the mass to charge ratio, 'z' shows the charge of the precursor.

**Table S3. MS analysis of intra-PrimPol cross-links.** The amino acid sequence of cross-linked PrimPol (blue) peptides identified in the MS analysis are shown. Cross-linked residues in each case are shown in bold. Peptide location indicates the location of peptide in the specific constructs used for the analysis, not the wild-type protein. Scores are based on the probability of the occurrence of an ion in addition to the intensity of the signal in the fragment spectrum, as given by the StavroX analysis software. 'm/z' indicates the mass to charge ratio, 'z' shows the charge of the precursor.

| #  | Oligonucleotide                 | Label     | Sequence                                                                                                      |
|----|---------------------------------|-----------|---------------------------------------------------------------------------------------------------------------|
| 1  | HP-16 Primer                    | 5'-Hex    | 5' -CACTGACTGTATGATG-3'                                                                                       |
| 2  | HP-20 Primer                    | 5'-Hex    | 5' -TGTCGTCTGTTCGGTCGTTTC-3'                                                                                  |
| 3  | HP-27 Primer                    | 5'-Hex    | 5' -TGTCGTCTGTTCGGTCGTTTCGGTCTTC-3'                                                                           |
| 4  | ND-50<br>Template <sub>TT</sub> | None      | 5' -CGCGCAGGGCGCACAACAGCCTTGAAGACCGAACGACCGAACAGACGACA-3'                                                     |
| 5  | ND-50<br>Template <sub>CC</sub> | None      | 5' -CGCGCAGGGCGCACAACAGAGCCGAAGACCGAACGACCGAACAGACGACA-3'                                                     |
| 6  | ND-97 Template                  | 3'-Biotin | 5' - ACCGCGAACTTGAATTCTAGTTCAGTCTAAATGCTCTCAAGCACTGAGCAATTCACAACATATGGCTTT<br>CGATTACCGAACGACCGAACAGACGACA-3' |
| 7  | Primase<br>Template             | 5'-Biotin | 5' -GTCTTCTATCTCGTCTATATTCTATTGTCTCTATGAATACCTTCATCAGTCTCACATAGATGCATC-3'                                     |
| 8  | 6-4(PP)<br>Template             | None      | 5' - CTCGTCAGCATCT <sup>T</sup> TCATCATAACAGTCAGTG-3'                                                         |
| 9  | CPD Template                    | None      | 5' -CGCGCAGGGCGCACAACAGCC <sup>T=T</sup> GAAGACCGAACGACCGAACAGACGACA-3'                                       |
| 10 | 8-oxo-G<br>Template             | None      | 5' -CGCGCAGGGCGCACAACAGCC <sup>8-oxo-G</sup> TGAAGACCGAACGACCGAACAGACGACA-3'                                  |
| 11 | dUracil Template                | None      | 5' -CGCGCAGGGCGCACAACAGCC <sup>U</sup> TGAAGACCGAACGACCGAACAGACGACA-3'                                        |
| 12 | AP Template                     | None      | 5' -CGCGCAGGGCGCACAACAGCC <sup>A</sup> PTGAAGACCGAACGACCGAACAGACGACA-3'                                       |

**Table S1**

| Score | m/z      | z | Measured Mass | Calculated Mass | PolDIP2 Peptide | Peptide location | PrimPol Peptide | Peptide location |
|-------|----------|---|---------------|-----------------|-----------------|------------------|-----------------|------------------|
| 131   | 807.389  | 3 | 2420.153      | 2420.152        | MAABTARR        | 0-8              | EDVHVFALEBK     | 58-68            |
| 105   | 411.462  | 4 | 1642.827      | 1642.829        | MAABTAR         | 0-7              | LYKSSK          | 290-295          |
| 101   | 755.038  | 3 | 2263.099      | 2263.099        | MAABTARR        | 0-8              | ILTBEPSQNK      | 341-350          |
| 90    | 566.53   | 4 | 2263.099      | 2263.099        | MAABTARR        | 0-8              | ILTBEPSQNK      | 341-350          |
| 87    | 767.721  | 3 | 2301.149      | 2301.154        | AENPAGHGSKEVKGK | 115-129          | MFTEK           | 231-235          |
| 86    | 411.462  | 4 | 1642.827      | 1642.829        | MAABTAR         | 0-7              | LYKSSK          | 290-295          |
| 84    | 532.022  | 4 | 2125.065      | 2125.071        | ETLRAWQEK       | 215-223          | QGFSFNK         | 224-230          |
| 81    | 709.027  | 3 | 2125.065      | 2125.071        | ETLRAWQEK       | 215-223          | QGFSFNK         | 223-230          |
| 63    | 1132.054 | 2 | 2263.101      | 2263.099        | MAABTARR        | 0-8              | ILTBEPSQNK      | 341-350          |
| 43    | 548.28   | 3 | 1642.825      | 1642.829        | MAABTAR         | 0-7              | LYKSSK          | 290-295          |
| 40    | 553.612  | 3 | 1658.821      | 1658.824        | MAABTAR         | 0-7              | LYKSSK          | 290-295          |
| 32    | 566.53   | 4 | 2263.098      | 2263.099        | MAABTARR        | 0-8              | ILTBEPSQNK      | 341-350          |
| 29    | 411.462  | 4 | 1642.826      | 1642.829        | MAABTAR         | 0-7              | LYKSSK          | 290-295          |

**Table S2**

| Score | m/z      | z | Measured Mass | Calculated Mass | Peptide 1      | Peptide location | Peptide 2                    | Peptide location |
|-------|----------|---|---------------|-----------------|----------------|------------------|------------------------------|------------------|
| 172   | 665.01   | 3 | 1993.015      | 1993.012        | FSDTLR         | 335-340          | VALEVTEDNK                   | 300-309          |
| 137   | 712.013  | 3 | 2134.025      | 2134.031        | QK             | 351-353          | SBKEDVHVFALE<br>BK           | 55-68            |
| 30    | 496.439  | 5 | 2478.165      | 2478.17         | SSK            | 293-295          | mFTEKATEESW<br>TSNSKK        | 231-247          |
| 27    | 541.628  | 6 | 3244.729      | 3244.725        | NFRLYKSSK      | 287-295          | VALEVTEDNKFF<br>PIQSK        | 300-316          |
| 25    | 1311.319 | 3 | 3931.943      | 3931.935        | PANPGADGKK     | 118-127          | DVSDEYQYFLSS<br>LVSNVRFSDTLR | 317-340          |
| 20    | 578.709  | 5 | 2889.514      | 2889.515        | IGKR           | 296-299          | NNmGEKHLFVD<br>LGVYTRNR      | 268-286          |
| 15    | 1475.068 | 3 | 4423.189      | 4423.19         | IYLVTTYAEFWFYK | 75-89            | NNmGEKHLFVD<br>LGVYTRNR      | 268-286          |
| 11    | 712.013  | 3 | 2134.025      | 2134.031        | QK             | 351-353          | SBKEDVHVFALE<br>BK           | 55-68            |

**Table S3**



## Supplementary Figures

### **Fig. S1. PoIDIP2 stimulates full-length primer extension by PrimPol.**

PrimPol (100nM) was incubated with 5' labelled 20/50-mer primer/template substrates (20nM) and dNTPs (100 $\mu$ M) in the absence or presence of increasing concentrations of GST-PoIDIP2 over a time course (1, 3, 5, 10, 20 mins). 'C' indicates the no enzyme control. Quantification of the data is shown in Fig. 1 C and D.

### **Fig. S2. PoIDIP2 does not increase primer synthesis by PrimPol.**

(A) The primase activity of PrimPol was analysed in the absence and presence of GST-PoIDIP2 or GST only over a range of concentrations (as indicated).

(B) Quantification of the data shown in A, showing the percentage of primer synthesis reaction products generated in the presence of varying concentrations of GST-PoIDIP2 or GST only. Nucleotide size markers are shown on the left of the figure.

### **Fig. S3. Untagged PoIDIP2 increases PrimPol's processivity at higher concentrations.**

Untagged-PoIDIP2 was titrated into reactions containing PrimPol (100nM) and 5' labelled 20/97-mer primer/template substrates (20nM). Reactions were initiated with dNTPs (100 $\mu$ M) and excess trap DNA and quenched at 0.5, 1, and 2 min time-points.

### **Fig. S4. PoIDIP2 does not allow PrimPol to displace mtSSB or RPA.**

The primer extension activity of PrimPol was analysed in the absence and presence of PoIDIP2 and mtSSB or RPA using a 5' labelled 20/97-mer primer/template substrate. 'C' indicates the no enzyme control.

### **Fig. S5. PrimPol is inhibited in the presence of PoIDIP2 and PCNA in combination.**

PrimPol's (100nM) polymerase activity was examined using a 5' labelled 20/97-mer primer/template substrate in the presence of PCNA alone, or a combination of PCNA and PoIDIP2 over a time course (1, 3, 5, 10, 20 mins). 'C' indicates the no enzyme control.

**Fig. S6. PoIDIP2 does not enable PrimPol to bypass CPDs or Ap sites, or alter the fidelity of dU or 6-4pp bypass.**

- (A) PrimPol was incubated with dNTPs (100 $\mu$ M) and 5'-labelled 20/50-mer primer/template substrates containing a single CPD or Ap site 8nt downstream of the primer-template junction in the absence or presence of PoIDIP2 (800nM). Reactions were monitored over a time-course of 1, 3, 5, 10, and 20 mins. 'C' indicates the no enzyme control reaction.
- (B) PrimPol was incubated with single dNTPs (dATP, dCTP, dGTP, or dTTP) (100 $\mu$ M) and 5'-labelled primer/template substrates with a single dU or 6-4pp as the immediate templating base in the presence of GST-PoIDIP2. 'C' indicates the no dNTP control.

**Fig. S7. PoIDIP2 does not affect PrimPol's fidelity on non-damaged DNA.**

- (A) PrimPol was incubated with single dNTPs (dATP, dCTP, dGTP, or dTTP) (100 $\mu$ M) and 5'-labelled 27/50-mer primer/template substrates containing dC as the immediate templating base. Reactions were monitored over a time-course of 1, 3, 5, 10, and 20 mins. 'C' indicates the no dNTP control reaction.
- (B) The data shown in A were normalised against the correct incoming base (dGTP) and quantified to give the relative misincorporation of each base opposite the templating dC.

**Fig. S8. PoIDIP2<sup>51-368</sup> does not stimulate PrimPol's processivity or DNA binding.**

- (A) PoIDIP2<sup>51-368</sup> was titrated into reactions containing PrimPol (100nM) and 5' labelled 20/97-mer primer/template substrates (20nM). Reactions were initiated with dNTPs (100 $\mu$ M) and excess trap DNA and quenched at 0.5, 1, 2, 5, and 10 min time-points.
- (B) PrimPol<sup>24-354</sup> was incubated with increasing concentrations of PoIDIP2<sup>51-368</sup> ((0.05, 0.1, 0.2, 0.3, 0.4, 0.5, 0.75, 1  $\mu$ M)) in EMSA reactions containing 5'-labelled 20/97-mer primer-template substrates.

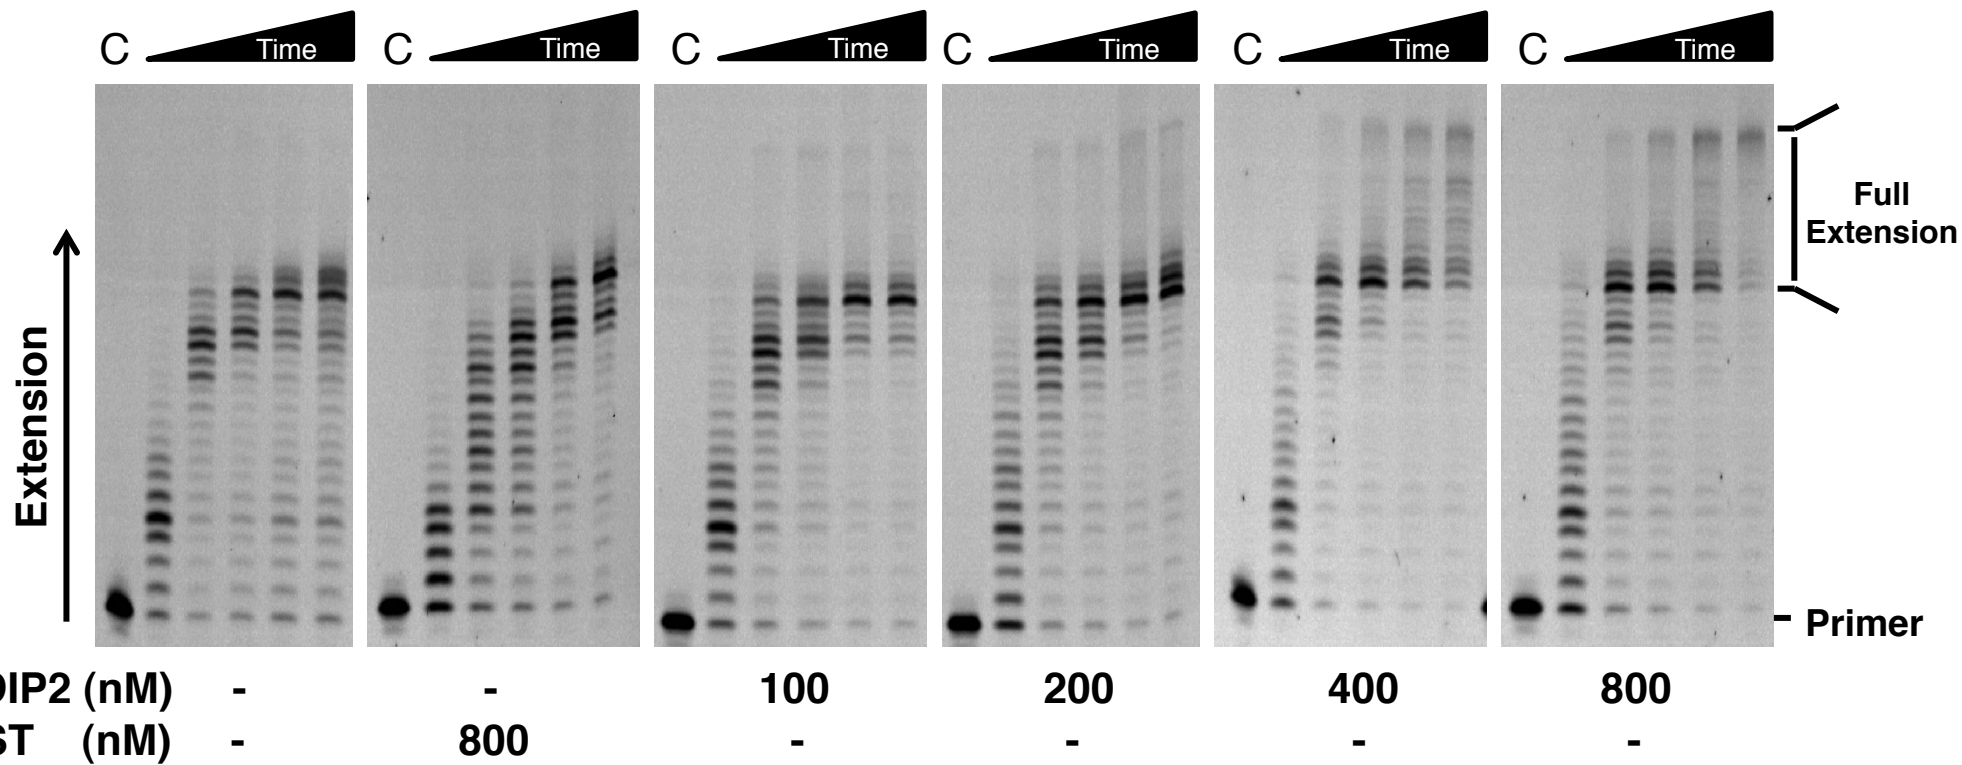

Figure S1

**A**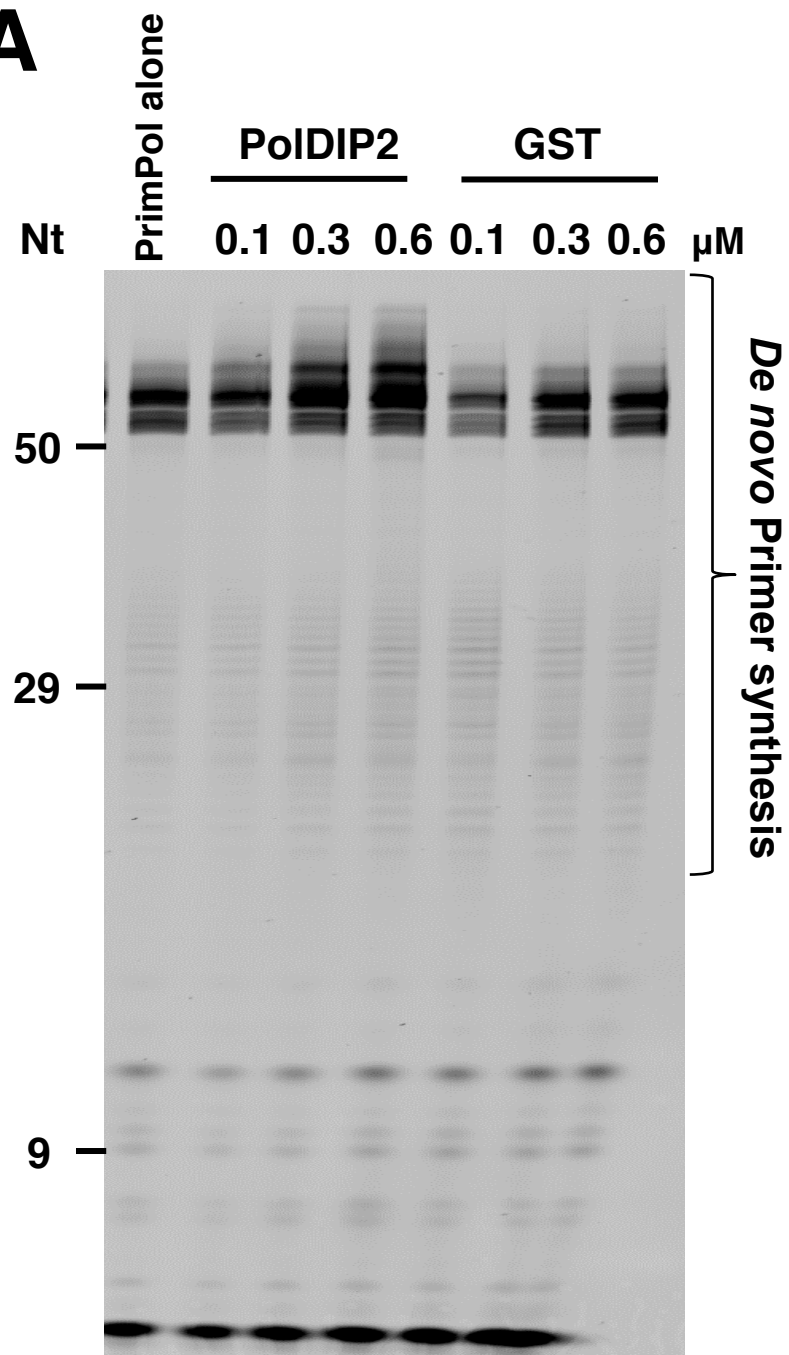**B**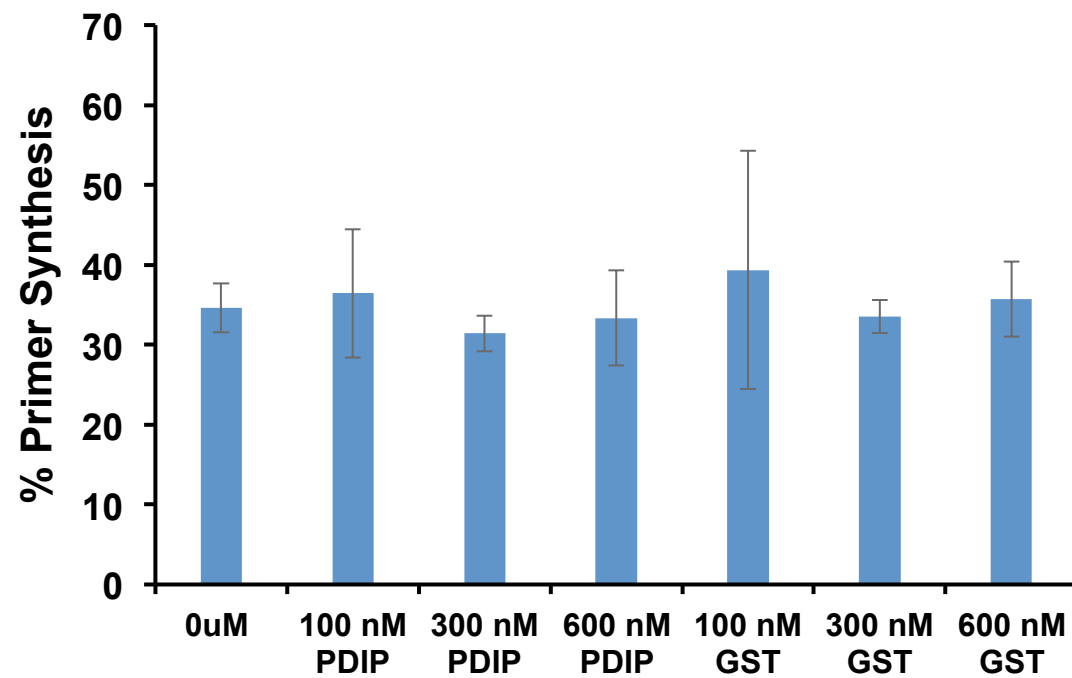**Figure S2**

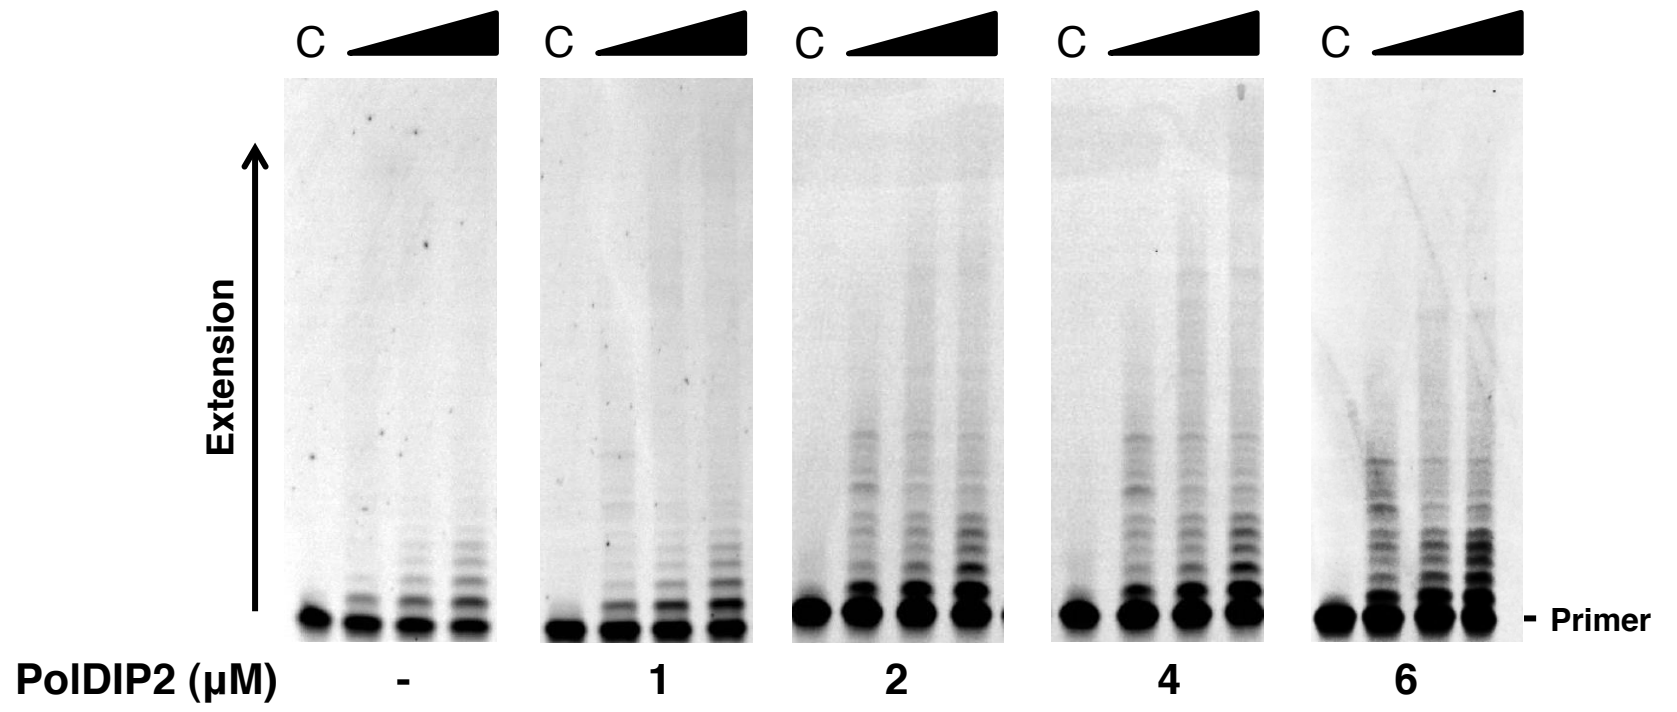

Figure S3

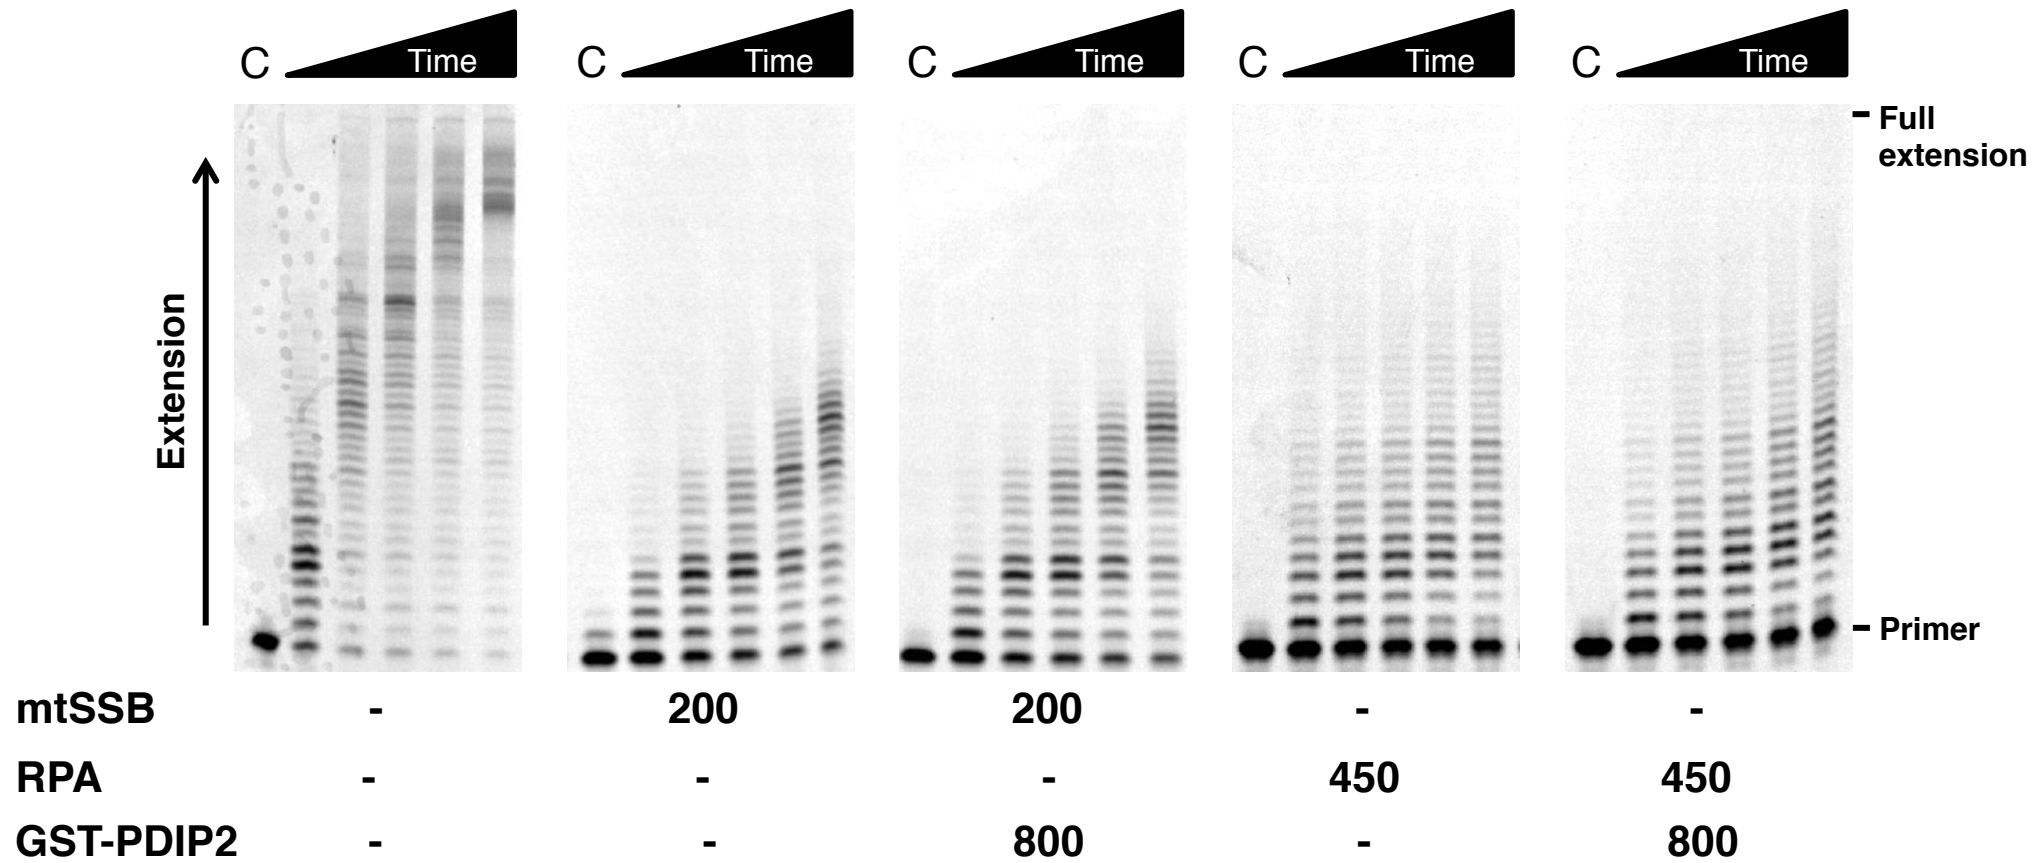

Figure S4

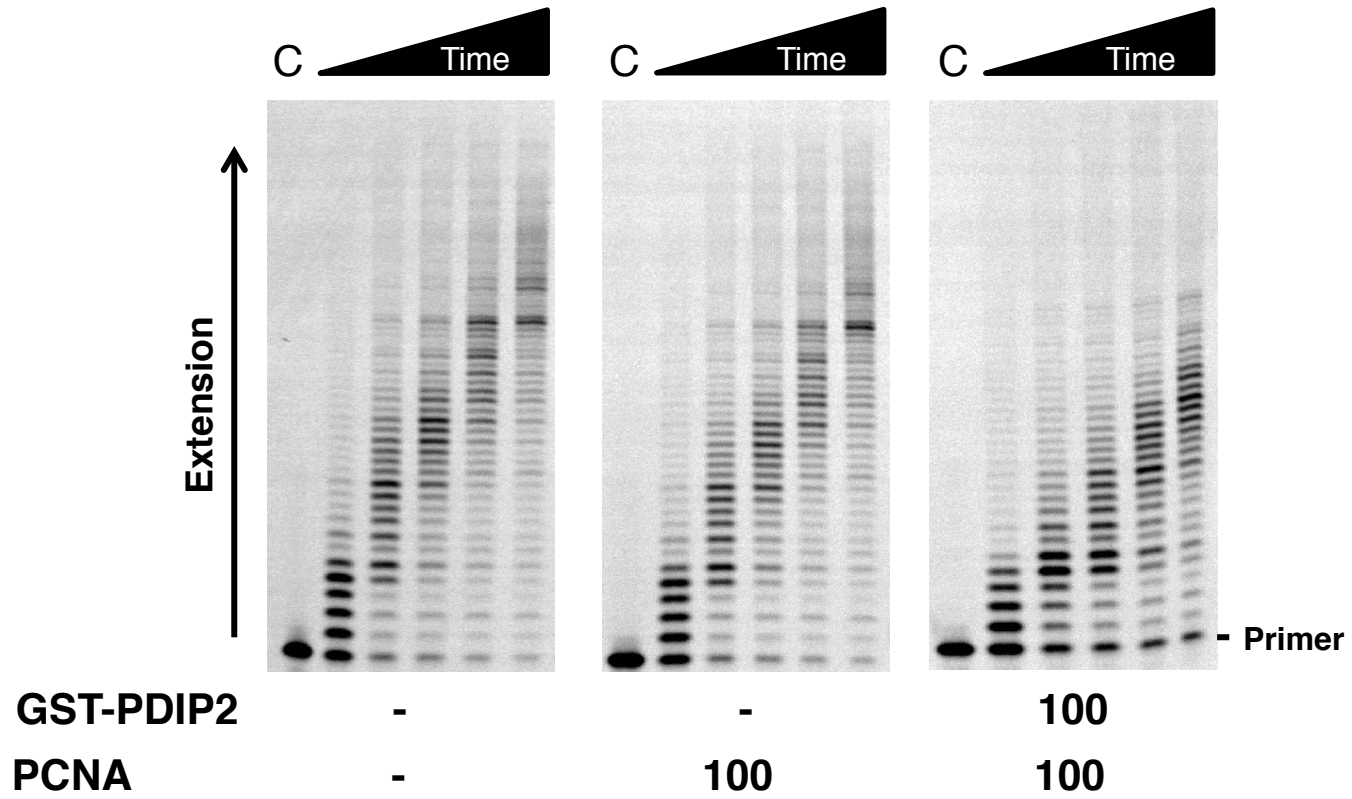

Figure S5

**A**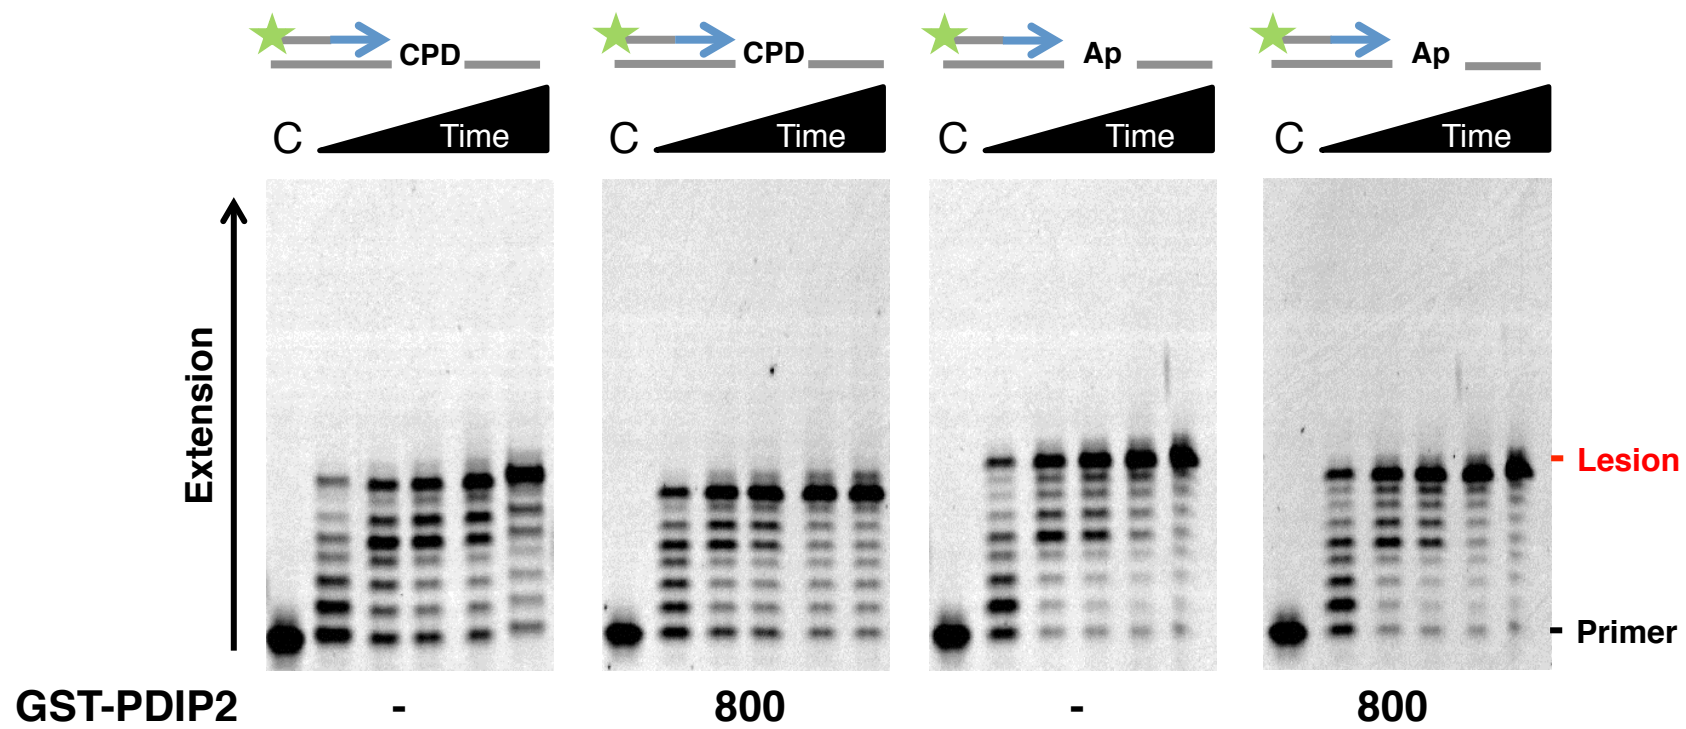**B**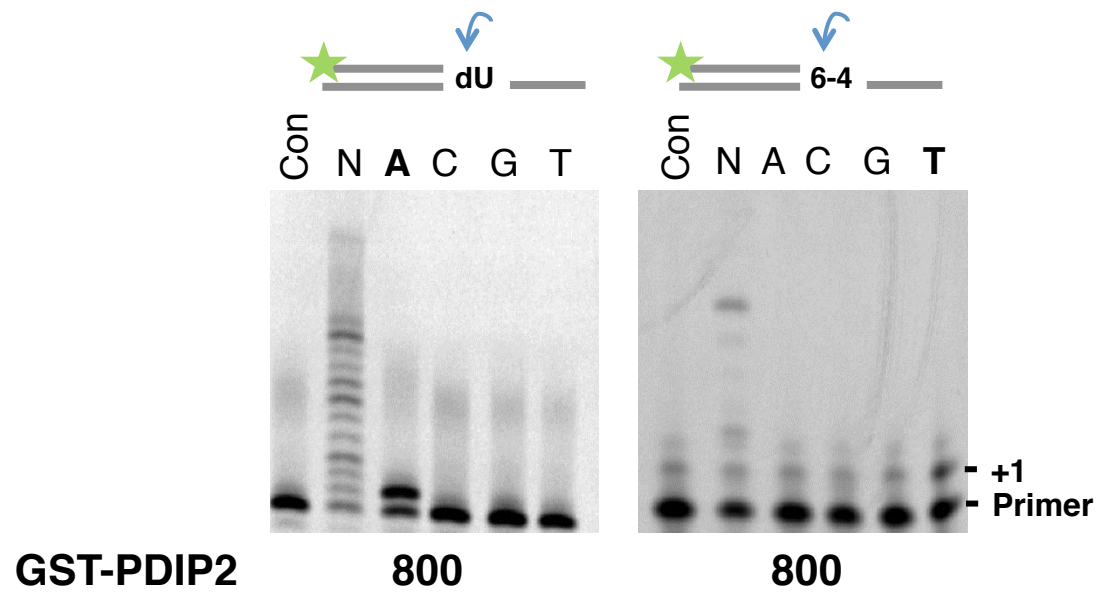

Figure S6



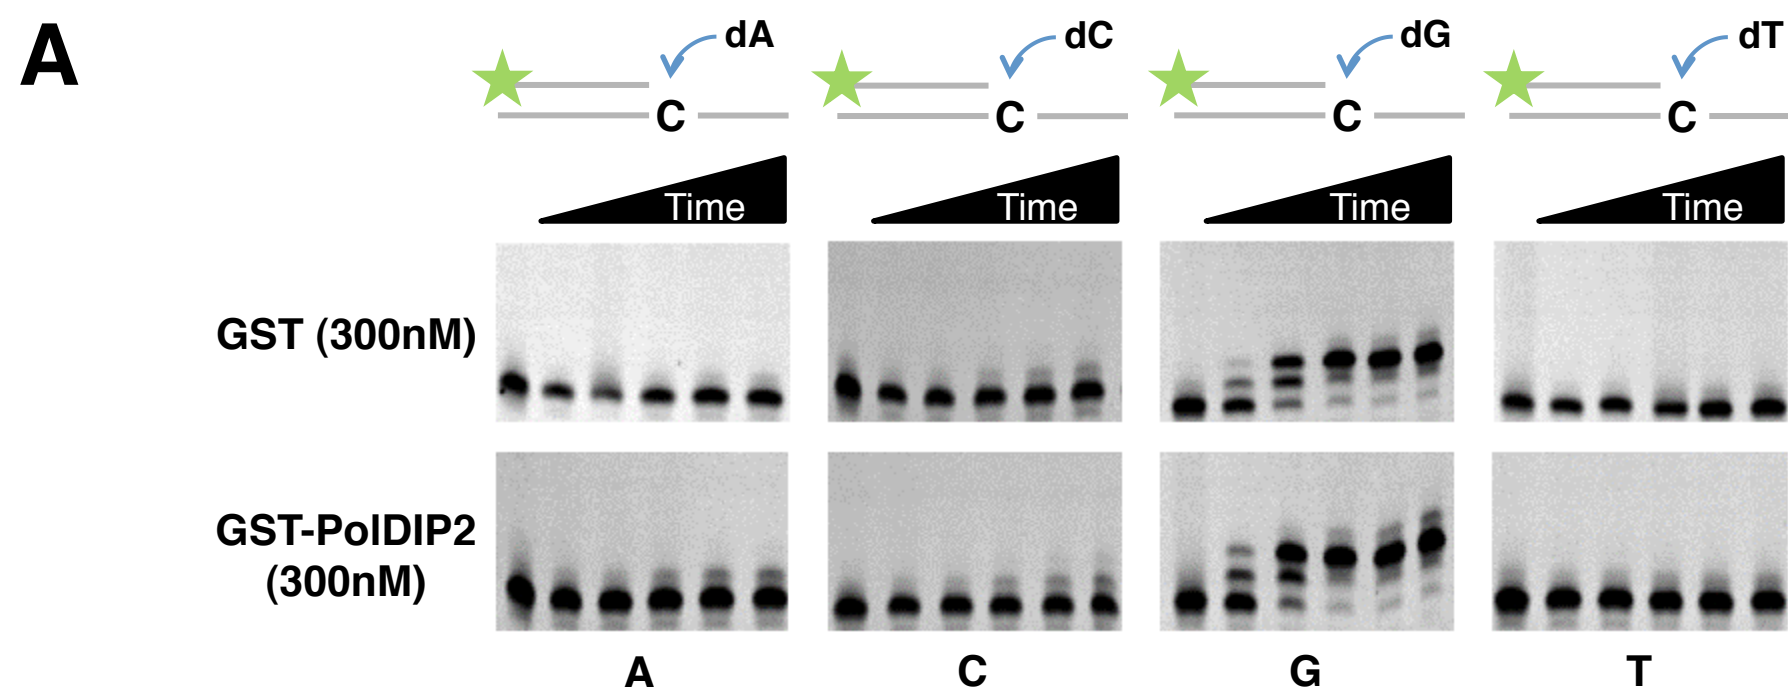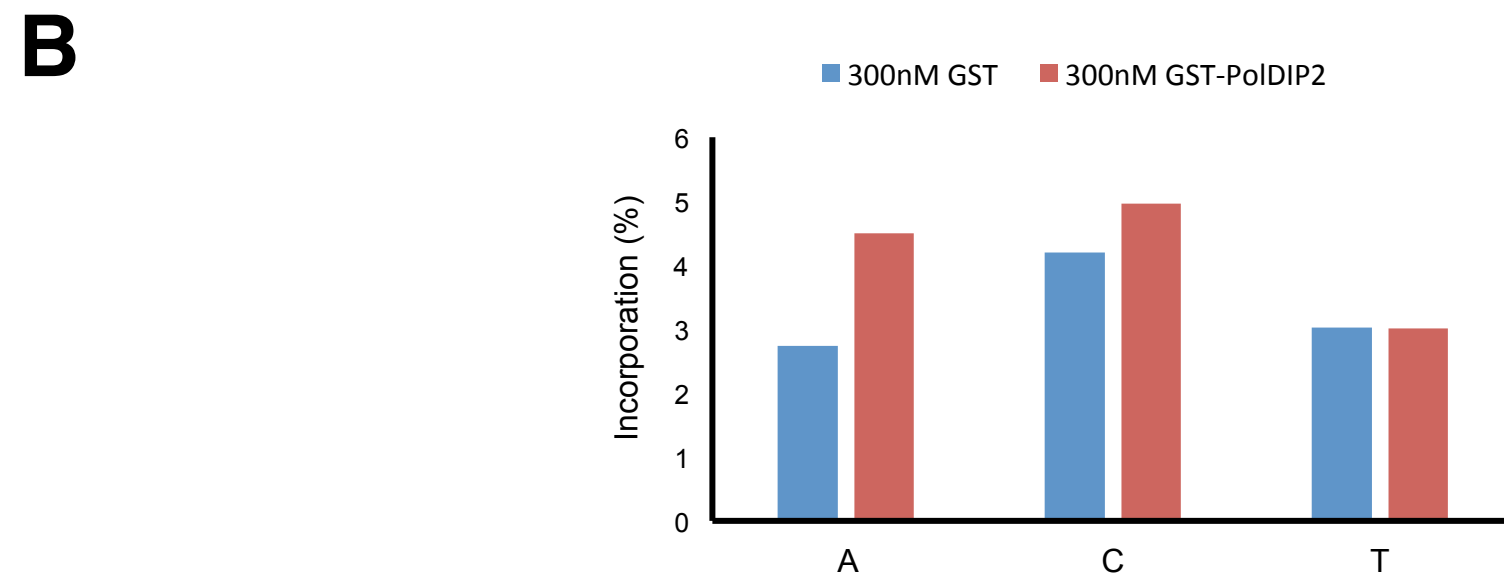

Figure S7

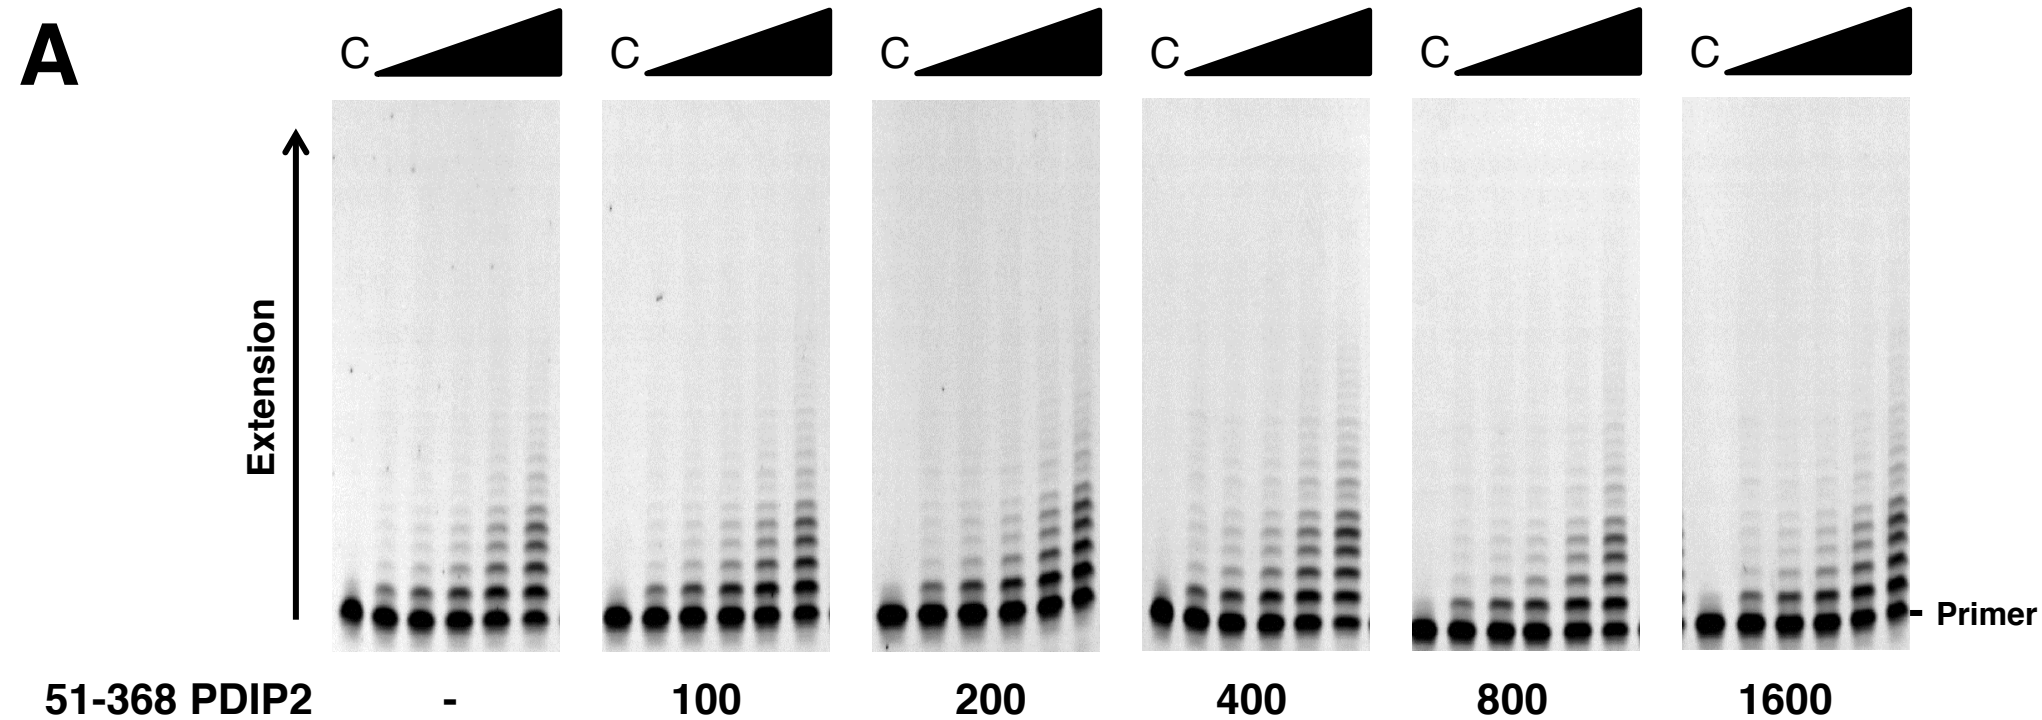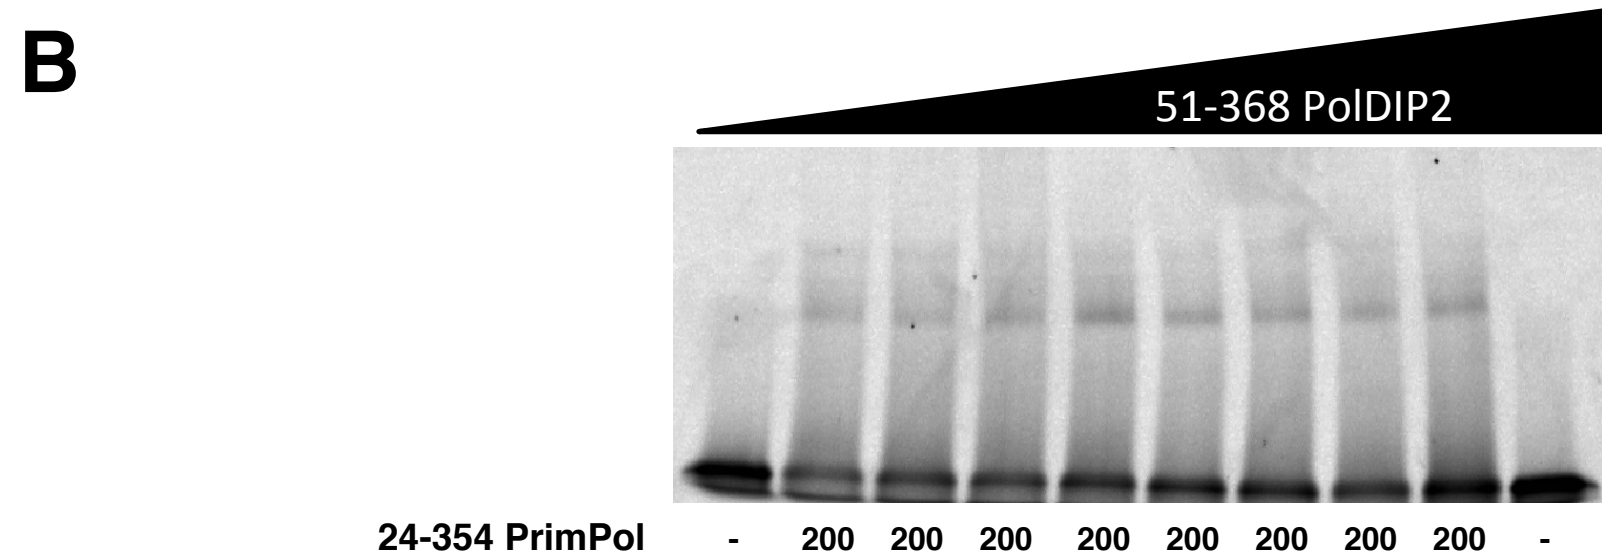

Figure S8
